# Supplementary material for: Sequencing and Analysis of Lumpy Skin Disease Virus Whole Genomes Reveals a New Viral Subgroup in West and Central Africa
Source: MDPI journal article supplement (doi:10.3390/v16040557), 2024-04-03
Supplement: s1 [file s1]

**Table S1.** Sequencing data.

| <b>Sample</b>           | <b>Read pair<br/>count (raw)</b> | <b>Read pair<br/>count (QC<br/>filtered and<br/>mapped)</b> | <b>Covered<br/>percent</b> | <b>Average<br/>coverage</b> |
|-------------------------|----------------------------------|-------------------------------------------------------------|----------------------------|-----------------------------|
| LSDV Cameroon VI        | 303308                           | 152406                                                      | 99.995                     | 303.0321                    |
| LSDV KS-1               | 498437                           | 236045                                                      | 99.995                     | 474.1635                    |
| LSDV Ghana              | 455049                           | 97533                                                       | 99.995                     | 186.576                     |
| LSDV Gough              | 519435                           | 385538                                                      | 99.995                     | 794.2664                    |
| LSDV Israel             | 462304                           | 261050                                                      | 99.995                     | 519.3423                    |
| LSDV Jordan             | 334547                           | 230174                                                      | 99.995                     | 464.1506                    |
| LSDV Oman               | 293367                           | 187436                                                      | 99.995                     | 371.709                     |
| LSDV Cameroon<br>Tenapi | 743667                           | 22841                                                       | 99.918                     | 24.8808                     |
| LSDV Hong Kong          | 19011                            | 10148                                                       | 99.991                     | 25.845                      |
| LSDV Sri Lanka 1        | 289267                           | 196270                                                      | 99.995                     | 319.8821                    |
| LSDV Sri Lanka 2        | 340211                           | 240636                                                      | 99.995                     | 397.1682                    |
| LSDV Sri Lanka 3        | 175445                           | 114134                                                      | 99.995                     | 202.5817                    |
| LSDV Neethling          | 171577                           | 89928                                                       | 99.958                     | 202.3082                    |
| LSDV Senegal            | 138969                           | 94250                                                       | 99.945                     | 142.0289                    |
| LSDV Nigeria            | 536394                           | 322308                                                      | 99.995                     | 313.543                     |
| LSDV Ethiopia 1         | 478946                           | 433312                                                      | 99.995                     | 389.073                     |
| LSDV Ethiopia 2         | 582162                           | 474974                                                      | 99.995                     | 465.16                      |
| LSDV Ethiopia 3         | 499906                           | 427060                                                      | 99.995                     | 418.135                     |
| LSDV Ethiopia 4         | 369422                           | 303582                                                      | 99.979                     | 297.148                     |
| LSDV Mongolia 1         | 1230424                          | 681090                                                      | 99.989                     | 647.04                      |
| LSDV Mongolia 2         | 903474                           | 577720                                                      | 99.991                     | 551.95                      |

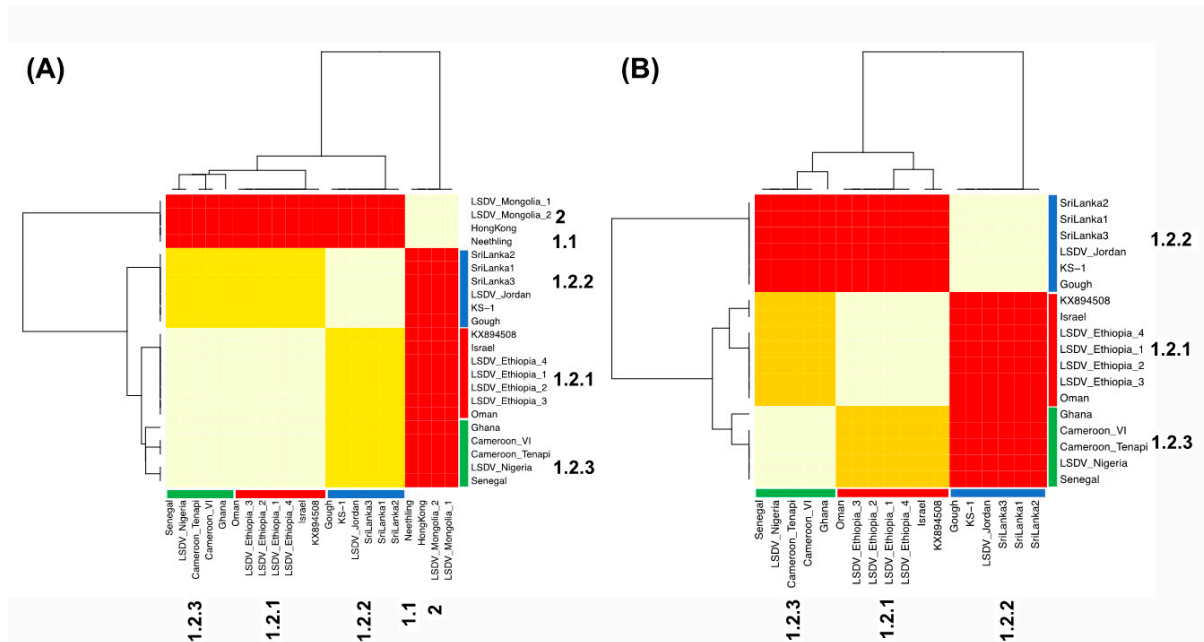

**Figure S1.** Model-based genetic clustering of (A) all 22 samples and (B) Clade 1.2 (18 samples) shown by the dashed box in (A). (A) Clades 1.1 and 2 were distinct, as was Clade 1.2.2 to a lesser extent. (B) Clade 1.2 was divided into three differentiated groups: Clade 1.2.2 related to Kenyan sheep and goat pox (KSGP) vaccines (blue,  $n = 6$ ), Clade 1.2.3 linked to west and central Africa (green,  $n = 5$ ) and Clade 1.2.1 with samples from the Middle East and Africa (red,  $n = 7$ ).

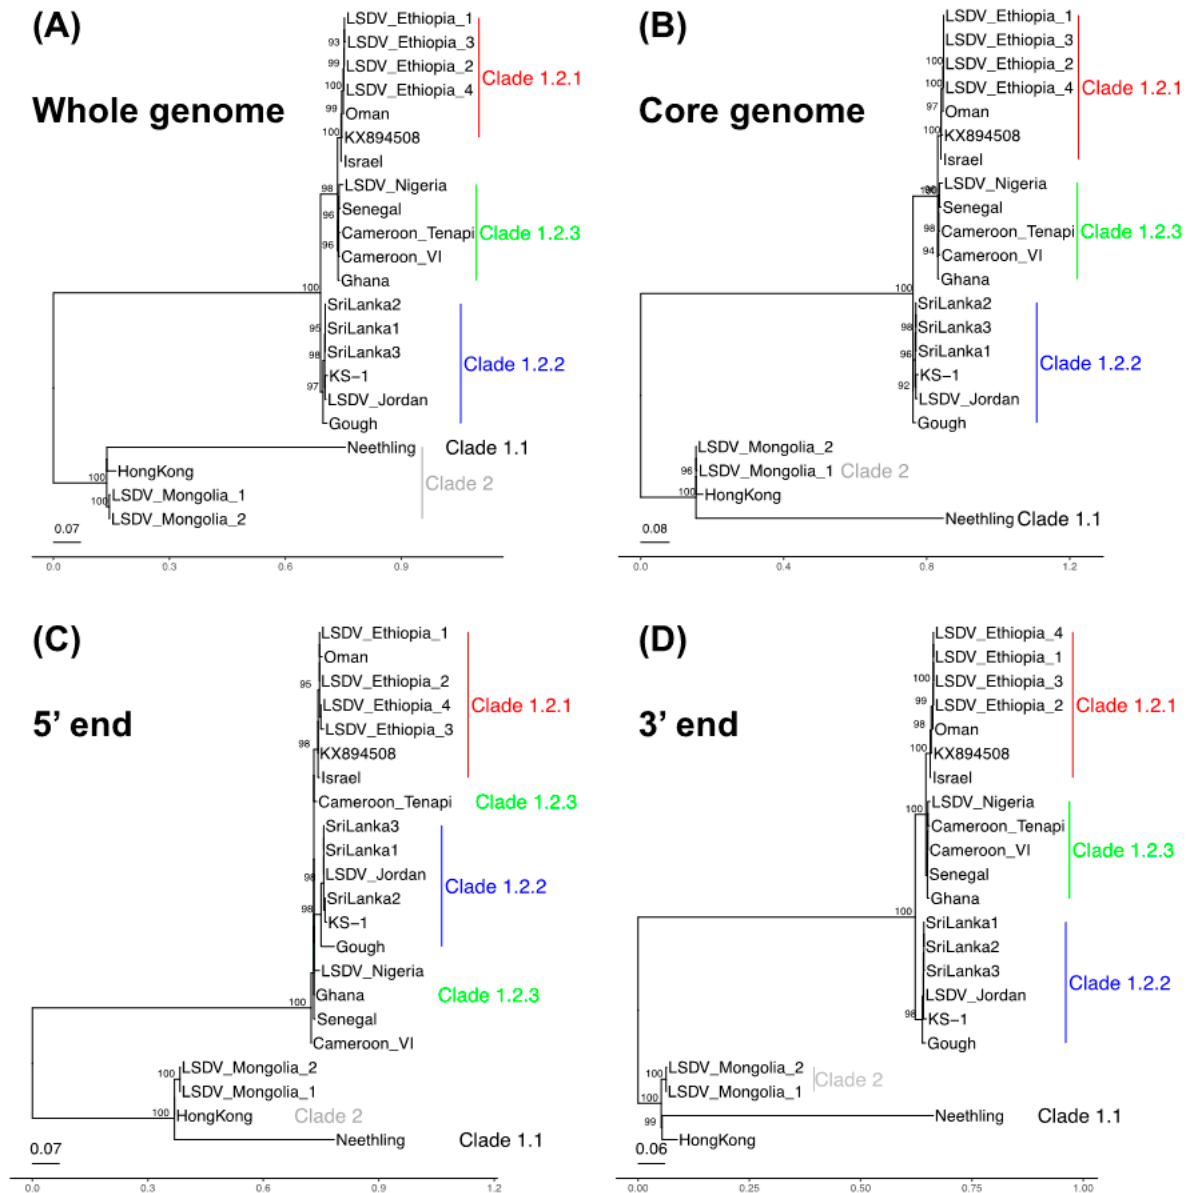

**Figure S2.** Phylogenies constructed for all  $n = 22$  LSDV samples from SNPs across the: (A) whole genome, (B) core genome, (C) 5' accessory region and (D) 3' accessory region. Clade 1.1 (the Neethling strain) was distinct from the Hong Kong/ Mongolia group. Clade 1.2 was divided into three groups: Clade 1.2.2 related to Kenyan sheep and goat pox (KSGP) vaccines (blue,  $n = 6$ ), Clade 1.2.3 linked to west and central Africa (green,  $n = 5$ ) and Clade 1.2.1 with samples from the Middle East and Africa (red,  $n = 7$ ). (C) The 5' region was more divergent between Clades 1.1 and 1.2, (D) whereas the 3' region had the opposite pattern. Bootstraps with values  $> 90$  are shown.

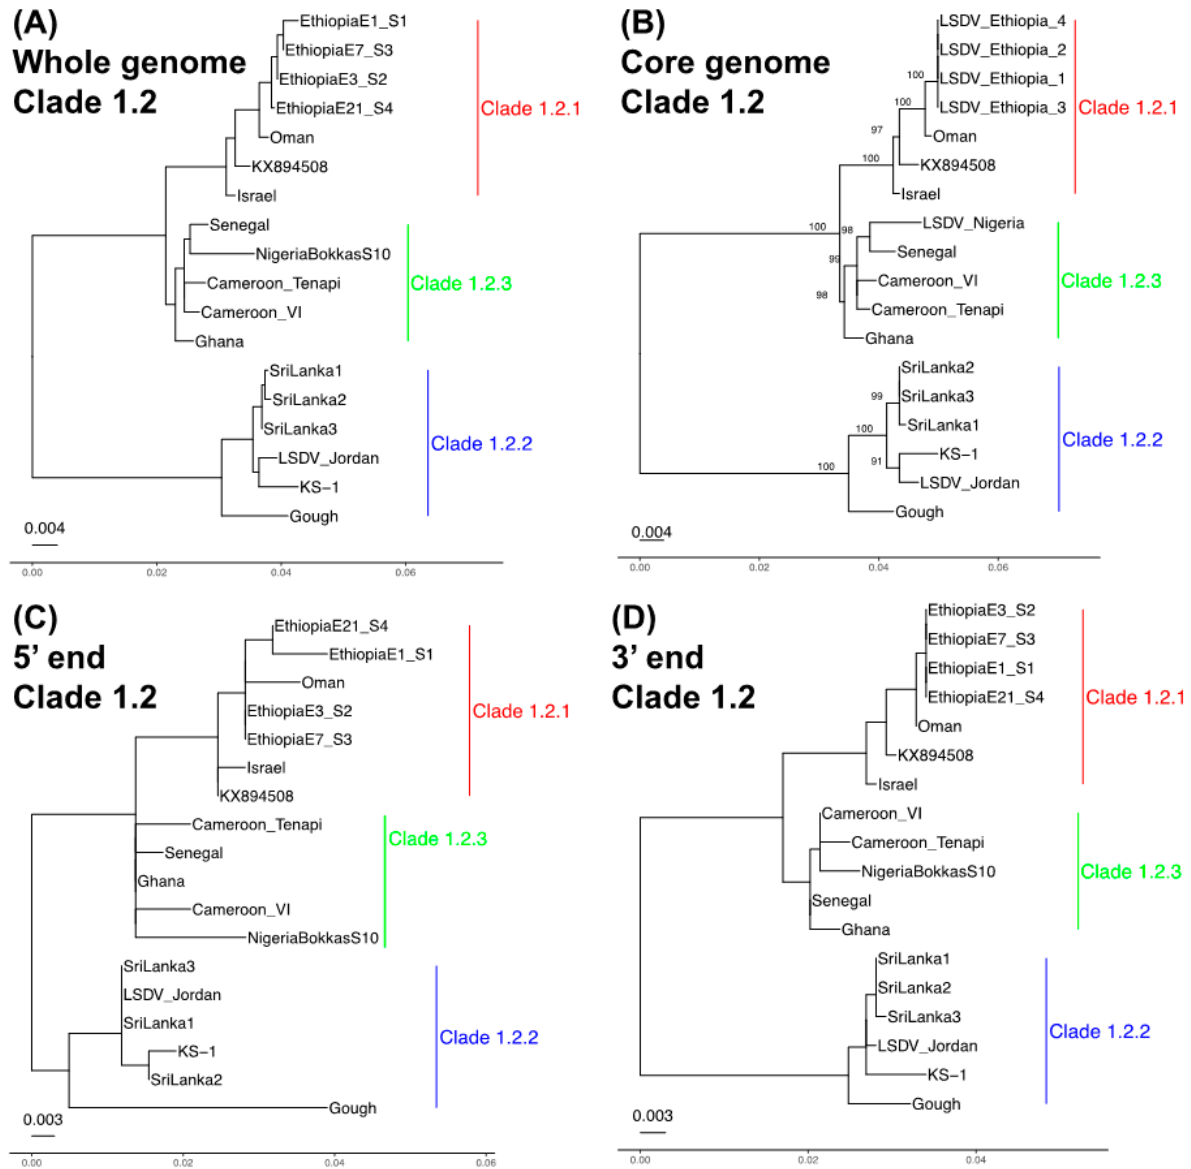

**Figure S3.** Phylogenies for the  $n = 18$  Clade 1.2 samples from SNPs across the: (A) whole genome, (B) core genome, (C) 5' accessory region and (D) 3' accessory region. Genetic differences were lowest at the 5' end. Clade 1.2 was divided into three groups: Clade 1.2.2 related to Kenyan sheep and goat pox (KSGP) vaccines (blue,  $n = 6$ ), Clade 1.2.3 linked to west and central Africa (green,  $n = 5$ ) and Clade 1.2.1 with samples from the Middle East and Africa (red,  $n = 7$ ). Bootstraps with values  $> 90$  are shown.

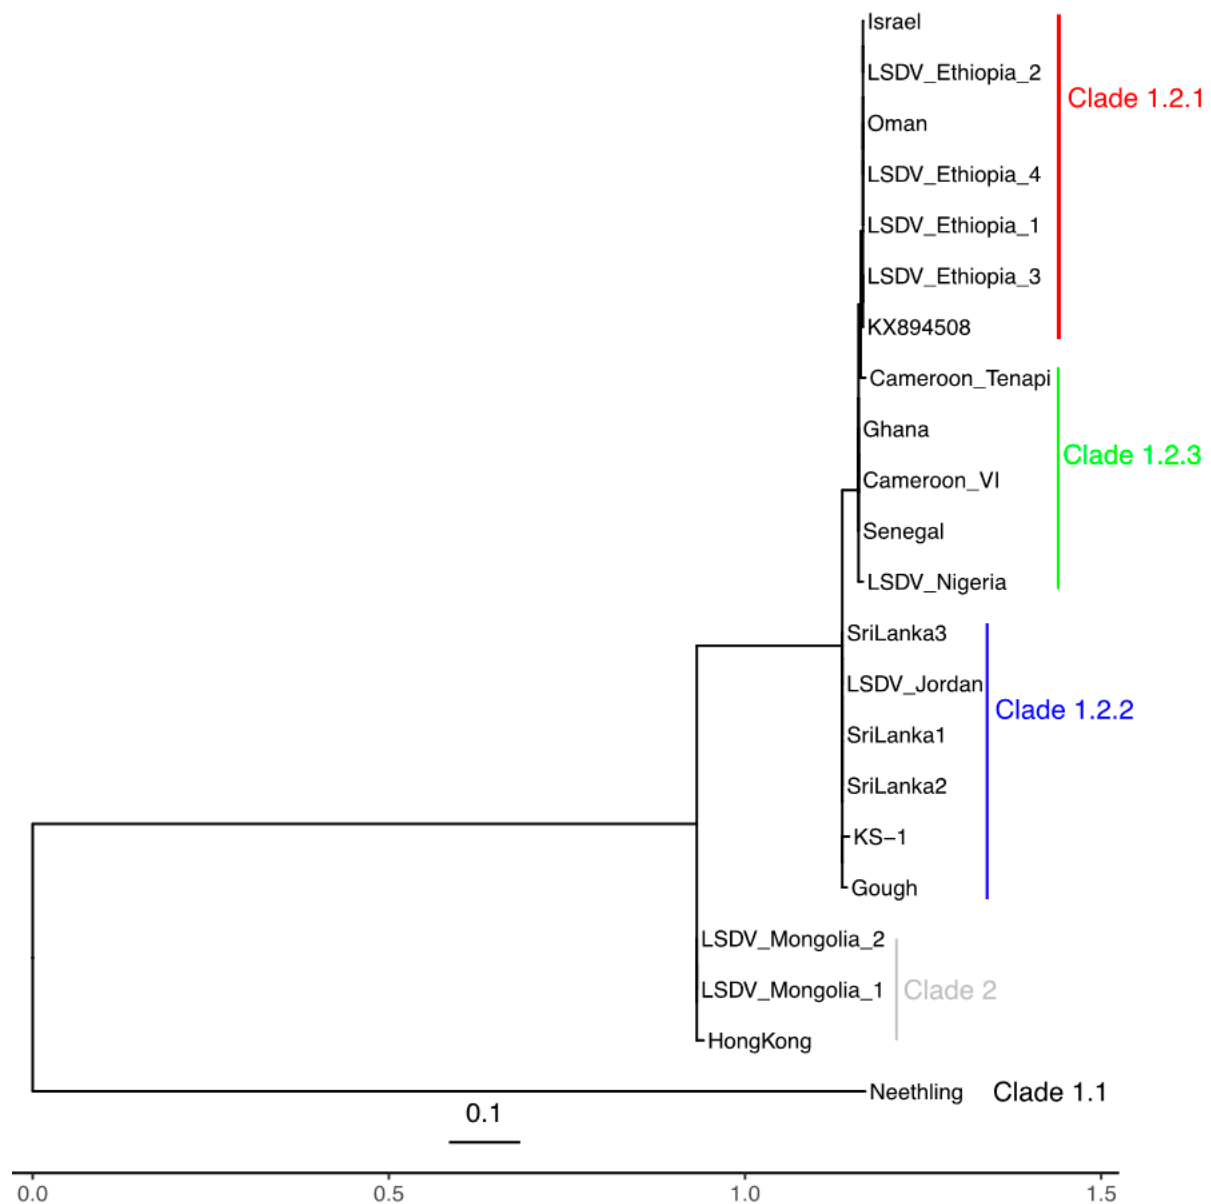

**Figure S4.** Phylogeny of an 8.8 Kb recombination tract (at 135,261 to 144,179 bp) shows that Clade 2's Hong Kong and Mongolia pair had ancestries more akin to Clade 1.2.2 than to Neethling in Clade 1.1. Bootstraps with values > 90 are shown.
